# Supplementary material for: Back to Basics – The Influence of DNA Extraction and Primer Choice on Phylogenetic Analysis of Activated Sludge Communities
Source: PubMed Central journal article supplement (PMC4504704; doi:10.1371/journal.pone.0132783), 2015-07-16
Supplement: pone.0132783.s011.pdf [file pone.0132783.s011.pdf]

**S1 File.** Quantification limit was 0.5%. When 0.2% is indicated, it indicates that they were present but below 0.5%. 0 means none were found. Average values are from Nielsen et al., 2010. ND: Not Determined.

| Functional group     | Probe name                      | Target                                                                                                                                                              | Phylum                 | Class               | Reference                                   | Aalborg West | Average Value (%) | Range (%) |
|----------------------|---------------------------------|---------------------------------------------------------------------------------------------------------------------------------------------------------------------|------------------------|---------------------|---------------------------------------------|--------------|-------------------|-----------|
| AOB                  | Nso190                          | Betaproteobacterial AOB*                                                                                                                                            | Proteobacteria         | Betaproteobacteria  | Mobarry et al., 1996                        | 2.5          | 3.8               | 1.2-8.2   |
|                      | Nsv443                          | <i>Nitrosospira</i> spp.                                                                                                                                            |                        |                     | Mobarry et al., 1996                        | 0            | 1.4               | 0.2-3.2   |
|                      | Nsm156                          | <i>Nitrosomonas</i> spp., <i>Nitrosococcus mobilis</i>                                                                                                              |                        |                     | Mobarry et al., 1996                        | 1.2          | 1.6               | 0.2-3.8   |
| NOB                  | Ntspa662                        | Genus <i>Nitrospira</i> *                                                                                                                                           | Nitrospirae            | Nitrospira          | Daims et al., 2001                          | 3.4          | 3.1               | 0.2-5.7   |
|                      | Ntspa1431                       | Sublineage I of the genus <i>Nitrospira</i>                                                                                                                         |                        |                     | Maixner et al., 2006                        | 0.3          | 1.6               | 0.2-2.5   |
|                      | Ntspa1151                       | Sublineage II of the genus <i>Nitrospira</i>                                                                                                                        |                        |                     | Maixner et al., 2006                        | 0.3          | 1.4               | 0.2-3.9   |
| Denitrifiers         | Curvi997 (Aqs997)               | <i>Curvibacter</i> (former <i>Aquaspirillum</i> )*                                                                                                                  | Proteobacteria         | Betaproteobacteria  | Thomsen et al., 2004                        | 5.3          | 7.1               | 1.5-14.1  |
|                      | ZRA23a (ZRA, ZOGLO647)          | Most members of <i>Zoogloea</i> lineage, not <i>Z. Resiniphila</i> *                                                                                                |                        |                     | Rossello-Mora et al., 1995                  | 0.5          | 2.1               | 0.2-5.2   |
|                      | Azo644 (AZA645)                 | Most members of the <i>Azoarcus</i> cluster*                                                                                                                        |                        |                     | Hess et al., 1997                           | 3.2          | 3.1               | 0.8-9.3   |
|                      | Thau646                         | <i>Thauera</i> *                                                                                                                                                    |                        |                     | Lanjoie et al., 2000                        | 3.8          | 3.1               | 0.2-6.2   |
|                      | G Rb                            | <i>Rhodobacter</i> , <i>Roseobacter</i> *                                                                                                                           |                        |                     | Giuliano et al., 1999                       | 2.2          | 1.2               | 0.2-3.4   |
| PAO/Denitrifiers     | PAOmix (PAO462, PAO651, PAO846) | Most <i>Accumulibacter</i> *                                                                                                                                        | Proteobacteria         | Betaproteobacteria  | Crocetti et al., 2000                       | 1.6          | 3.6               | 1.0-10.8  |
|                      | Acc-I-444                       | <i>Accumulibacter</i> – clade IA and others                                                                                                                         |                        |                     | Flowers et al., 2008                        | ND           | 1.5               | 0.2-4.6   |
| PAO                  | Acc-II-444                      | <i>Accumulibacter</i> – clade IIA, IIC, IID                                                                                                                         | Actinobacteria         | Actinobacteria      | Flowers et al., 2008                        | ND           | 1.1               | 0.2-3.2   |
|                      | Actino-221                      | Some <i>Tetrasphaera</i>                                                                                                                                            |                        |                     | Kong et al., 2005                           | ND           | 4.3               | 0.8-9.9   |
|                      | Actino-658                      | Some <i>Tetrasphaera</i>                                                                                                                                            |                        |                     | Kong et al., 2005                           | ND           | 4.1               | 1.0-10.8  |
|                      | Tet1-266                        | <i>Tetrasphaera</i> clade I*                                                                                                                                        |                        |                     | Nguyen et al., 2011                         | 8.5          | ND                | ND        |
|                      | Tet2-892, Tet2-174              | <i>Tetrasphaera</i> clade 2*                                                                                                                                        |                        |                     | Nguyen et al., 2011                         | 5.8          | ND                | ND        |
| Tet3-654             | <i>Tetrasphaera</i> clade 3*    | Nguyen et al., 2011                                                                                                                                                 | 3.9                    | ND                  | ND                                          |              |                   |           |
| GAO                  | GBmix                           | Most <i>Competibacter</i> *                                                                                                                                         | Proteobacteria         | Gammaproteobacteria | Kong et al., 2002                           | 0.3          | 1                 | 0-8.0     |
| Protein hydrolysers  | SAP-309                         | Saprosiraceae*                                                                                                                                                      | Bacteroidetes          | Sphingobacteria     | Schauer and Hahn 2005                       | 3.5          | 6.1               | 1.2-12.2  |
| Fermenters           | Str                             | <i>Streptococcus</i> spp.*                                                                                                                                          | Firmicutes             | Bacilli             | Trebesius et al., 2000                      | 1.3          | 2.3               | 0.2-6.7   |
| Filamentous bacteria | G123 T                          | <i>Thiothrix eikelboomii</i> , <i>T. nivea</i> , <i>T. unzii</i> , <i>T. fructosivorans</i> , <i>T. defluvii</i> , <i>T. Eikelbloom</i> Type 021N group I, II, III* | Proteobacteria         | Gammaproteobacteria | Kanagawa et al., 2000                       | 0.3          | 0.9               | 0.2-4.5   |
|                      | MPAmix                          | <i>Candidatus Microthrix parvicella</i> , <i>Candidatus Microthrix calida</i> *                                                                                     | Actinobacteria         | Actinobacteria      | Erhart et al., 1997; Levantesi et al., 2006 | 4.2          | 5.6               | 0.2-15.4  |
|                      | CFXmix (GNSB941, CFX1223)       | Phylum Chloroflexi*                                                                                                                                                 | Chloroflexi            |                     | Gieseke et al., 2001                        | 10.0         | 10.2              | 2.4-22.3  |
|                      | TM7905                          | Candidate division TM7*                                                                                                                                             | Candidate division TM7 |                     | Hugenholtz et al., 2001                     | 3.6          | 4.9               | 0.9-12.3  |
|                      | HHY-654                         | Several <i>Haliscomenobacter</i> species among others the type strain                                                                                               | Bacteroidetes          | Sphingobacteria     | Kragelund et al., 2008                      | 2.2          | 1.9               | 0.2-6.3   |

\* Data used for calculating summed abundance. Data without an asterisk is covered by a broader probe.

## References

- Crocetti GR., Hugenholtz P, Bond PL, Schuler A, Keller J, Jenkins D, Blackall LL. Identification of polyphosphate-accumulating organisms and design of 16S rRNA-directed probes for their detection and quantitation. *Appl Environ Microbiol.* 2000; 66: 1175-1182.
- Daims H, Nielsen JL, Nielsen PH, Schleifer KH, Wagner M. In situ characterization of Nitrospira-like nitrite-oxidizing bacteria active in wastewater treatment plants. *Appl Environ Microbiol.* 2001; 67 :5273-5284.
- Erhart R, Bradford D, Seviour RJ, Amann R, Blackall LL. Development and use of fluorescent in situ hybridization probes for the detection and identification of 'Microthrix parvicella' in activated sludge. *Systematic and Applied Microbiol.* 1997; 20: 310-318.
- Flowers J, He S, Carvalho G, Peterson SB, Lopez C, Yilmaz S, et al. Ecological differentiation of Accumulibacter in EBPR reactors. In: *Proceedings of the Water Environment Federation, WEFTEC.* 2008; 12: 31-42.
- Gieseke A, Purkhold U, Wagner M, Amann R, Schramm A. Community structure and activity dynamics of nitrifying bacteria in a phosphate-removing biofilm. *Applied and Environmental Microbiology.* 2001; 67: 1351-1362.
- Giuliano L, De Domenico M, De Domenico E, Hofle MG, Yakimov MM. Identification of culturable oligotrophic bacteria within naturally occurring bacterioplankton communities of the Ligurian sea by 16S rRNA sequencing and probing. *Microbial Ecology.* 1999; 37: 77-85.
- Hess A, Zarda B, Hahn D, Haner A, Stax D, Hohener P, Zeyer J. In situ analysis of denitrifying toluene- and m-xylene-degrading bacteria in a diesel fuel-contaminated laboratory aquifer column. *Appl Environ Microbiol.* 1997; 63: 2136-2141.
- Hugenholtz P, Tyson GW, Webb RI, Wagner AM, Blackall LL. Investigation of Candidate division TM7, a recently recognized major lineage of the domain bacteria with no known pure-culture representatives. *Appl Environ Microbiol.* 2001; 67: 411-419.
- Kanagawa T, Kamagata Y, Aruga S, Kohno T, Horn M, Wagner M. Phylogenetic analysis of and oligonucleotide probe development for Eikelboom type 021N filamentous bacteria isolated from bulking activated sludge. *Appl Environ Microbiol.* 2000; 66: 5043-5052.
- Kong YH, Beer M, Rees GN, Seviour RJ. Functional analysis of microbial communities in aerobic/anaerobic sequencing batch reactors fed with different phosphorus/ carbon (P/C) ratios. *Microbiology-Sgm* 2002; 148: 2299-2307.

Kong Y, Nielsen JL, Nielsen PH. Identity and ecophysiology of uncultured actinobacterial polyphosphate-accumulating organisms in full-scale enhanced biological phosphorus removal plants. *Appl Environ Microbiol.* 2005; 71: 4076-4085.

Kragelund C, Levantesi C, Borger A, Thelen K, Eikelboom D, Tandoi V, et al. Identity, abundance and ecophysiology of filamentous bacteria belonging to the Bacteroidetes present in activated sludge plants. *Microbiology.* 2008; 154: 886-894.

Lajoie CA, Layton AC, Gregory IR, Sayler GS, Taylor DE, Meyers AJ. Zoogloal clusters and sludge dewatering potential in an industrial activated-sludge wastewater treatment plant. *Water Environment Research.* 2000; 72: 56-64.

Levantesi C, Rossetti S, Thelen K, Kragelund C, Krooneman J, Eikelboom D, et al. Phylogeny, physiology and distribution of 'Candidatus *Microthrix calida*', a new *Microthrix* species isolated from industrial activated sludge wastewater treatment plants. *Environ Microbiol.* 2006; 8: 1552-1563.

Maixner F, Noguera DR, Anneser B, Stoecker K, Wegl G, Wagner M, Daims H. Nitrite concentration influences the population structure of *Nitrospira*-like bacteria. *Environ Microbiol.* 2006; 8: 1487-1495.

Mobarry BK, Wagner M, Urbain V, Rittmann BE, Stahl DA. Phylogenetic probes for analyzing abundance and spatial organization of nitrifying bacteria. *Appl Environ Microbiol.* 1996; 62: 2156-2162.

Nguyen HTT, Le VQ, Hansen AA, Nielsen JL, Nielsen PH. High diversity and abundance of putative polyphosphate-accumulating *Tetrasphaera*-related bacteria in activated sludge systems. *FEMS Microbiol Ecol.* 2011; 75: 256-67.

Rossello-Mora RA, Wagner M, Amann R, Schleifer KH. The abundance of *Zoogloea ramigera* in sewage treatment plants. *Applied and Environ Microbiol.* 1995; 61: 702-707.

Schauer M, Hahn MW. Diversity and phylogenetic affiliations of morphologically conspicuous large filamentous bacteria occurring in the pelagic zones of a broad spectrum of freshwater habitats. *Appl Environ Microbiol* 2005; 71: 1931-1940.

Thomsen TR, Nielsen JL, Ramsing NB, Nielsen PH (2004). Micromanipulation and further identification of FISH-labelled microcolonies of a dominant denitrifying bacterium in activated sludge. *Environ Microbiol.* 2004; 6: 470-479.

Trebesius K, Leitritz L, Adler K, Schubert S, Autenrieth IB, Heesemann J. Culture independent and rapid identification of bacterial pathogens in necrotising fasciitis and streptococcal toxic shock syndrome by fluorescence in situ hybridisation. *Medical Microbiology and Immunology*. 2000; 188: 169-175.
